# Supplementary material for: Scheduling nab-paclitaxel combined with gemcitabine as first-line treatment for metastatic pancreatic adenocarcinoma
Source: PubMed Central journal article supplement (PMC7283477; doi:10.1038/s41416-020-0846-2), 2020-04-30
Supplement: 41416_2020_846_MOESM1_ESM.pdf [file 41416_2020_846_MOESM1_ESM.pdf]

## Supplementary Information

### Scheduling nab-Paclitaxel combined with gemcitabine as first line treatment for metastatic pancreatic adenocarcinoma

## Supplementary Tables

**Table S1:** RECIST v1.1 objective response\*

| <b>Best response</b>                                             | <b>Concomitant<br/>(N=75)</b> | <b>Sequential<br/>(N=71)</b> |
|------------------------------------------------------------------|-------------------------------|------------------------------|
| Complete response (CR)                                           | 0                             | 1 (2%)                       |
| Partial response (PR)                                            | 19 (31%)                      | 28 (50%)                     |
| Stable disease                                                   | 29 (48%)                      | 20 (36%)                     |
| Progressive disease                                              | 13 (21%)                      | 7 (13%)                      |
|                                                                  |                               |                              |
| Total no. assessed for response                                  | 61                            | 56                           |
| Overall response rate (CR+PR)<br>p=0.023                         | 31%(95%CI 20%-44%)            | 52%(95%CI 38%-65%)           |
|                                                                  |                               |                              |
| No. patients not assessable for response                         | 14                            | 15                           |
| No. of cycles received for patients with no response assessment: |                               |                              |
| 0                                                                | 1                             | 3                            |
| 1                                                                | 10                            | 11                           |
| 2                                                                | 3                             | 1                            |

\*Response was evaluated by investigators and central radiological review was performed for 10% of randomly selected patients with good concordance. Most discrepancies related to non-target lesions and did not affect key outcome measures.

**Table S2:** Summary of survival outcomes

|                                          |                            | <b>Concomitant</b> | <b>Sequential</b>  |
|------------------------------------------|----------------------------|--------------------|--------------------|
| All patients                             | N                          | 75                 | 71                 |
| PFS                                      | Median (months)<br>(95%CI) | 4.0 (3.0 – 5.4)    | 5.6 (3.6 – 7.2)    |
|                                          | 6 month (95%CI)            | 32% (21% - 43%)    | 46% ( 34% - 58%)   |
| HR=0.67, CI=0.47- 0.95, p log-rank=0.022 |                            |                    |                    |
| OS                                       | Median (months)<br>(95%CI) | 8.2 (6.1 – 10.0)   | 10.2 (6.3 – 11.5)  |
|                                          | 1 year (95%CI)             | 28% (18% - 38%)    | 29% (18% - 40%)    |
| HR=0.93, CI=0.65-1.33, p log-rank=0.70   |                            |                    |                    |
| Evaluable patients*                      | N                          | 48                 | 50                 |
| PFS                                      | Median (months)<br>(95%CI) | 5.2 (3.8 – 6.1)    | 7.2 (5.5 – 8.8)    |
|                                          | 6 month (95%CI)            | 40% (26% - 53%)    | 57% (43% - 71%)    |
| HR=0.60, CI=0.40-0.90, p log-rank= 0.014 |                            |                    |                    |
| OS                                       | Median (months)<br>(95%CI) | 9.7 (7.4 – 11.6)   | 11.2 (10.1 – 11.9) |
|                                          | 1year (95%CI)              | 31% (18% - 44%)    | 36% (23% - 49%)    |
| HR=0.83, CI=0.54-1.28, p log-rank= 0.40  |                            |                    |                    |

\*patients who completed at least 2 cycles of planned treatment and at least 2 of the 3 planned treatment days with both drugs administered in each cycle

**Table S3:** EORTC QLQ-C30 and PAN26 QoL questionnaire scores – changes from baseline (pretreatment) at week 12 and week 26, by trial arm. Clinically important differences are considered small for mean score changes of 5-10 points, moderate for 10-20 points and large for >20 points. Moderate/large gains in QoL scores occurring in both arms in at least 1 time point are highlighted in green. Moderate/large losses in QoL scores occurring in both arms in at least 1 time point are highlighted in pink. Moderate/large gains in QoL scores occurring in one arm only in at least 1 time point are highlighted in yellow. Moderate/large losses in QoL scores occurring in one arm only in at least 1 time point are highlighted in orange. 95%CI and p values for the difference between arms are provided in parentheses.

|                            |                         | Baseline     | Week 12                   | Week 26                  |
|----------------------------|-------------------------|--------------|---------------------------|--------------------------|
| <b>EORTC QLQ –C30</b>      |                         |              |                           |                          |
| Global health status / QoL | Concomitant             | 63.16(19.82) | 2.95                      | -7.49                    |
|                            | Sequential              | 60.61(21.41) | -3.73                     | -0.54                    |
|                            | Difference between arms |              | 6.68(-2.07-15.43;0.132)   | -6.95(-15.96-2.06;0.128) |
| Physical Functioning       | Concomitant             | 76.23(20.52) | -10.89                    | -13.89                   |
|                            | Sequential              | 71.54(24.07) | -11.26                    | -10.11                   |
|                            | Difference between arms |              | 0.37(-8.9-9.65;0.936)     | -3.77(-13.47-5.92;0.439) |
| Role Functioning           | Concomitant             | 65.46(32.25) | -11.40                    | -13.86                   |
|                            | Sequential              | 64.46(31.00) | -10.42                    | -15.95                   |
|                            | Difference between arms |              | -0.98(-14.71-12.76;0.888) | 2.09(-13.02-17.2;0.783)  |
| Emotional Functioning      | Concomitant             | 74.40(22.06) | 7.02                      | 5.41                     |
|                            | Sequential              | 71.09(25.66) | 6.60                      | 4.93                     |
|                            | Difference between arms |              | 0.41(-7.96-8.79;0.922)    | 0.48(-7.8-8.75;0.908)    |
| Cognitive Functioning      | Concomitant             | 81.43(23.15) | -2.78                     | -2.27                    |
|                            | Sequential              | 79.80(24.02) | -0.65                     | 2.04                     |
|                            | Difference between arms |              | -2.13(-10-5.73;0.590)     | -4.31(-12.18-3.55;0.276) |
| Social Functioning         | Concomitant             | 73.43(27.01) | -8.07                     | -10.74                   |
|                            | Sequential              | 67.93(30.98) | -7.44                     | -12.16                   |
|                            | Difference between arms |              | -0.63(-13.19-11.93;0.921) | 1.42(-11.13-13.97;0.821) |
| Fatigue                    | Concomitant             | 40.90(25.74) | 7.51                      | 7.76                     |
|                            | Sequential              | 43.06(27.02) | 5.13                      | 7.19                     |
|                            | Difference between arms |              | 2.39(-9.45-14.22;0.689)   | 0.56(-10.97-12.09;0.922) |
| Nausea / Vomiting          | Concomitant             | 14.25(20.27) | 1.83                      | -4.38                    |
|                            | Sequential              | 15.69(21.72) | -2.47                     | 0.71                     |
|                            | Difference between arms |              | 4.3(-5.87-14.48;0.402)    | -5.09(-13.33-3.15;0.221) |
| Pain                       | Concomitant             | 38.10(27.97) | -10.91                    | 0.23                     |
|                            | Sequential              | 39.22(31.38) | -14.81                    | -5.86                    |
|                            | Difference between arms |              | 3.9(-8.59-16.4;0.535)     | 6.09(-8.89-21.07;0.419)  |
| Dyspnoea                   | Concomitant             | 14.93(24.12) | 9.06                      | 16.73                    |
|                            | Sequential              | 20.40(28.99) | 8.68                      | 3.81                     |
|                            | Difference between arms |              | 0.38(-13.28-14.05;0.956)  | 12.92(-0.81-26.65;0.065) |
| Insomnia                   | Concomitant             | 39.13(31.81) | -17.45                    | -12.50                   |
|                            | Sequential              | 37.81(31.73) | -17.04                    | -14.21                   |
|                            | Difference between arms |              | -0.42(-12.51-11.68;0.945) | 1.71(-12.26-15.69;0.807) |
| Appetite loss              | Concomitant             | 42.16(36.70) | -0.57                     | -15.42                   |
|                            | Sequential              | 50.00(35.73) | -14.73                    | -9.48                    |

|                          |                         | Baseline     | Week 12                  | Week 26                  |
|--------------------------|-------------------------|--------------|--------------------------|--------------------------|
|                          | Difference between arms |              | 14.17(0.2-28.13;0.047)   | -5.93(-21.11-9.24;0.437) |
| Constipation             | Concomitant             | 31.86(30.71) | -11.97                   | -8.93                    |
|                          | Sequential              | 29.41(35.28) | -14.95                   | -7.93                    |
|                          | Difference between arms |              | 2.98(-9.24-15.2;0.628)   | -1(-15.12-13.13;0.888)   |
| Diarrhoea                | Concomitant             | 15.24(24.53) | 6.36                     | 1.72                     |
|                          | Sequential              | 18.18(29.92) | -0.50                    | -1.21                    |
|                          | Difference between arms |              | 6.86(-4.66-18.37;0.239)  | 2.93(-9.91-15.77;0.650)  |
| Financial Problems       | Concomitant             | 14.49(25.87) | -6.16                    | -2.58                    |
|                          | Sequential              | 31.28(36.74) | 2.97                     | 1.00                     |
|                          | Difference between arms |              | -9.13(-20.27-2.02;0.107) | -3.59(-13.62-6.44;0.477) |
| <b>EORTC QLQ-PAN26</b>   |                         |              |                          |                          |
| Pancreatic pain          | Concomitant             | 37.56(19.42) | -16.66                   | -7.85                    |
|                          | Sequential              | 41.42(24.71) | -20.46                   | -15.71                   |
|                          | Difference between arms |              | 3.79(-5.51-13.09;0.419)  | 7.86(-4.09-19.8;0.192)   |
| Digestive                | Concomitant             | 32.85(31.57) | -3.88                    | -11.56                   |
|                          | Sequential              | 43.28(34.09) | -7.73                    | -4.32                    |
|                          | Difference between arms |              | 3.85(-8.98-16.68;0.551)  | -7.24(-21.7-7.22;0.320)  |
| Altered bowel habit      | Concomitant             | 29.10(23.09) | 12.28                    | 13.18                    |
|                          | Sequential              | 28.61(28.55) | 4.35                     | -3.42                    |
|                          | Difference between arms |              | 7.93(-2.66-18.52;0.140)  | 16.6(5.94-27.26;0.003)   |
| Hepatic                  | Concomitant             | 7.25(11.95)  | -3.39                    | -2.69                    |
|                          | Sequential              | 13.93(23.32) | -4.61                    | -0.38                    |
|                          | Difference between arms |              | 1.23(-4.45-6.9;0.668)    | -2.31(-10.85-6.23;0.590) |
| Body image               | Concomitant             | 24.15(28.08) | 12.78                    | 7.67                     |
|                          | Sequential              | 26.62(30.02) | 7.76                     | 6.44                     |
|                          | Difference between arms |              | 5.02(-7.55-17.59;0.429)  | 1.22(-10.65-13.09;0.837) |
| Health care satisfaction | Concomitant             | 85.07(21.54) | -9.30                    | -4.65                    |
|                          | Sequential              | 86.36(20.45) | -0.42                    | 2.45                     |
|                          | Difference between arms |              | -8.88(-18.78-1.02;0.078) | -7.1(-16.6-2.4;0.140)    |
| Sexuality                | Concomitant             | 56.11(41.96) | 8.83                     | 3.50                     |
|                          | Sequential              | 51.44(37.24) | 17.49                    | 8.89                     |
|                          | Difference between arms |              | -8.65(-24.47-7.17;0.278) | -5.38(-24.17-13.4;0.566) |

**Table S4.** Correlation between pre-treatment whole blood CDA activity and patient characteristics

| Patient characteristics               | Univariable                     |                                   |                              | multivariable regression |
|---------------------------------------|---------------------------------|-----------------------------------|------------------------------|--------------------------|
|                                       | Pearson Correlation coefficient | Spearman Correlation coefficients | Wilcoxon/Kruskal-Wallis test | p value                  |
| Age                                   | -0.068, p=0.44                  | -0.074, p=0.40                    |                              | 0.75                     |
| Gender                                |                                 |                                   | P=0.83                       | 0.14                     |
| Karnofsky PS                          | -0.23, p=0.0061                 | -0.20, p=0.019                    | P=0.042                      | 0.21                     |
| Site of primary tumour                |                                 |                                   | P=0.30                       | 0.80                     |
| Liver metastases                      |                                 |                                   | P=0.10                       | 0.93                     |
| CA19.9 (U/ml)                         | 0.076, p=0.40                   | 0.13, p=0.13                      |                              | 0.71                     |
| C-Reactive protein(mg/L)              | 0.54, p<0.0001                  | 0.35, p<0.0001                    |                              | 0.30                     |
| Neutrophil count (10 <sup>9</sup> /L) | 0.82, p<0.0001                  | 0.82, p<0.0001                    |                              | <0.0001                  |

**Table S5.** Pre-treatment whole blood CDA activity as a continuous variable on PFS and OS

|     | HR (95%CI), p value in Cox regression model |                                        |
|-----|---------------------------------------------|----------------------------------------|
|     | Unadjusted (univariate)                     | Adjusted for baseline neutrophil count |
| PFS | 1.03 (1.01-1.06), p=0.0012                  | 1.00 (0.97-1.04), p=0.78               |
| OS  | 1.05 (1.02-1.07), p<0.0001                  | 1.02 (0.99-1.06), p=0.24               |

**Table S6.** Whole blood CDA activity, by tumour epithelial CDA expression

| Tissue tumour epithelial CDA expression | N  | Mean  | Median | Std Dev | 25th Pctl | 75th Pctl | Minimum | Maximum |
|-----------------------------------------|----|-------|--------|---------|-----------|-----------|---------|---------|
| Negative/weakly positive/positive       | 67 | 14.10 | 10.33  | 8.77    | 8.47      | 17.55     | 4.14    | 43.85   |
| Strongly positive                       | 33 | 16.07 | 13.70  | 7.28    | 12.05     | 19.15     | 6.88    | 35.60   |
| Unknown                                 | 32 | 12.53 | 11.90  | 7.28    | 7.96      | 15.35     | 3.75    | 41.50   |

P value of Wilcoxon test =0.031

## Supplementary Figures

Figure S1 Consort Diagram

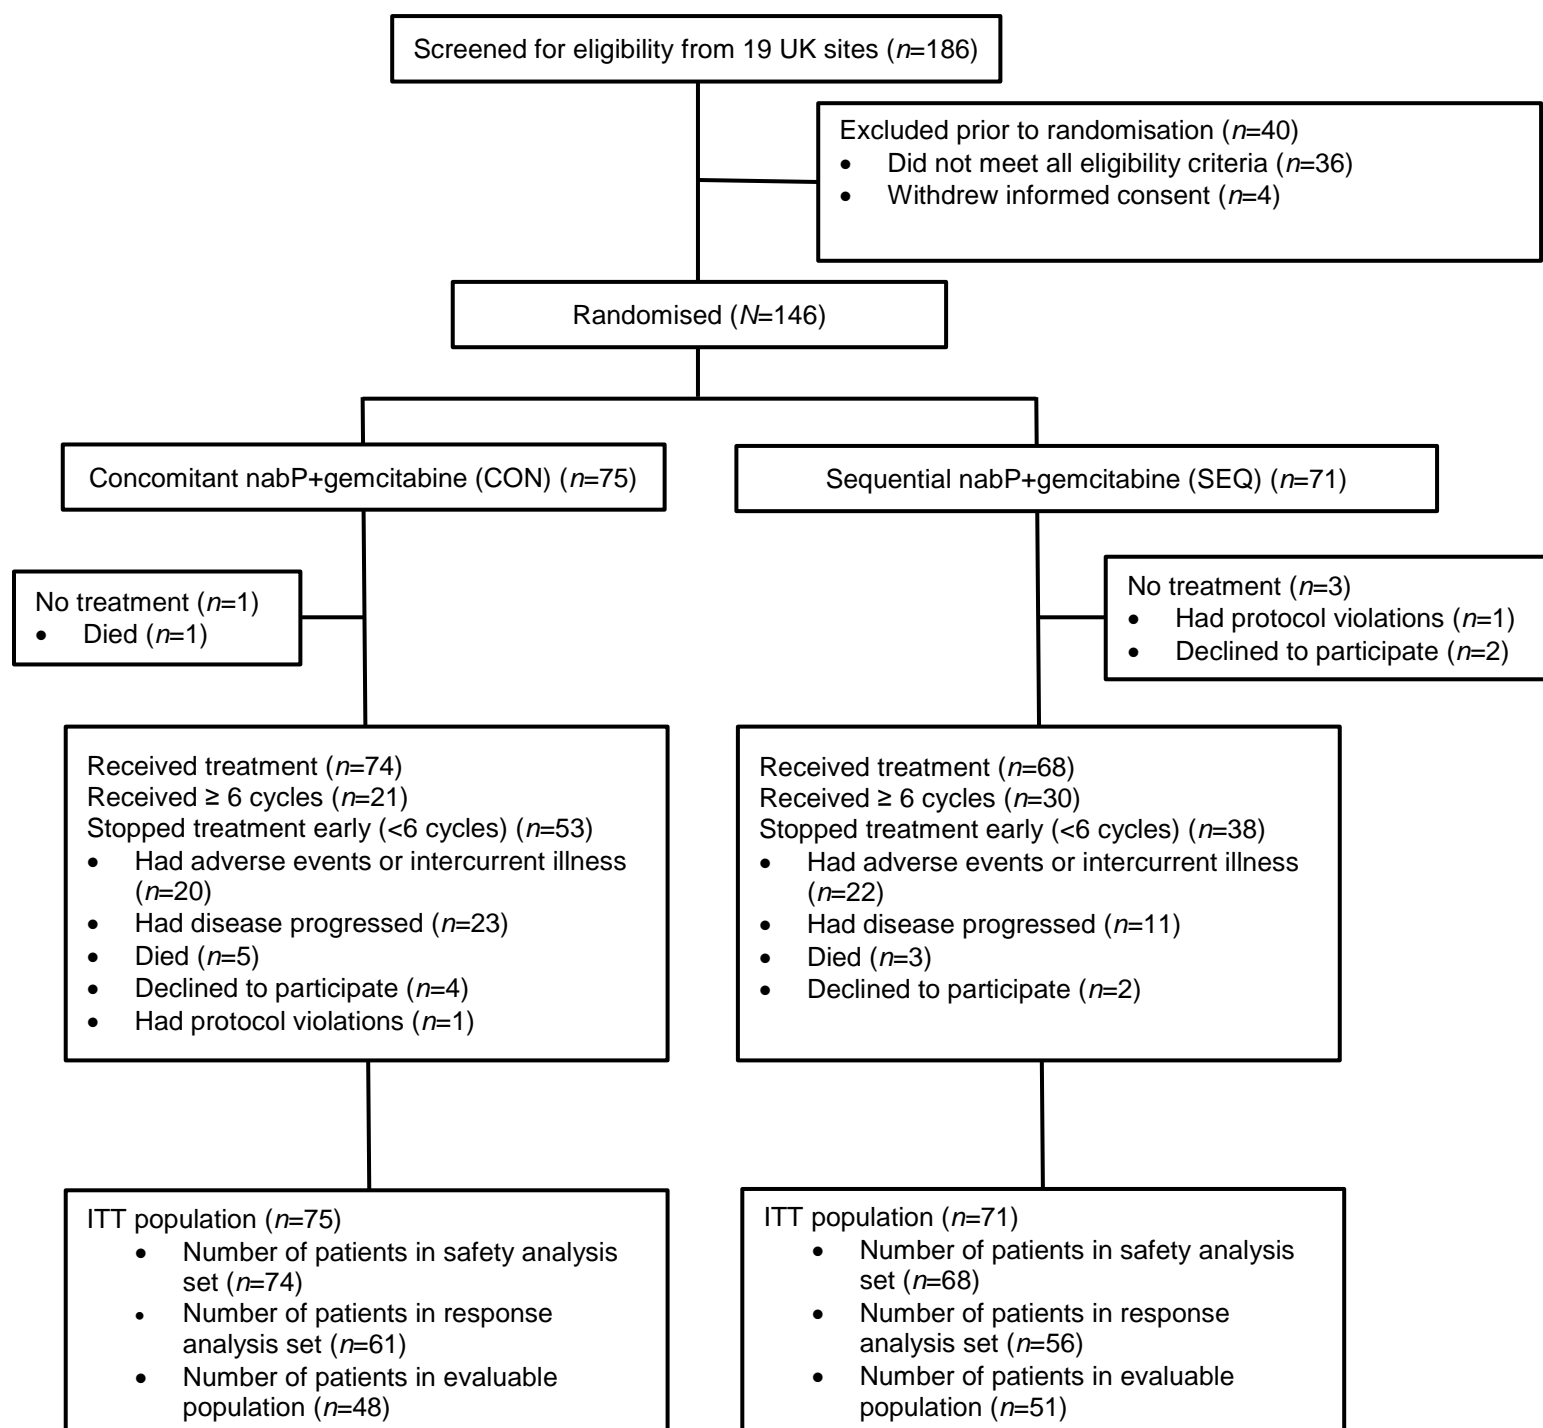

**Figure S2.** Scatter plot demonstrating correlation between pre-treatment CDA activity and neutrophil count

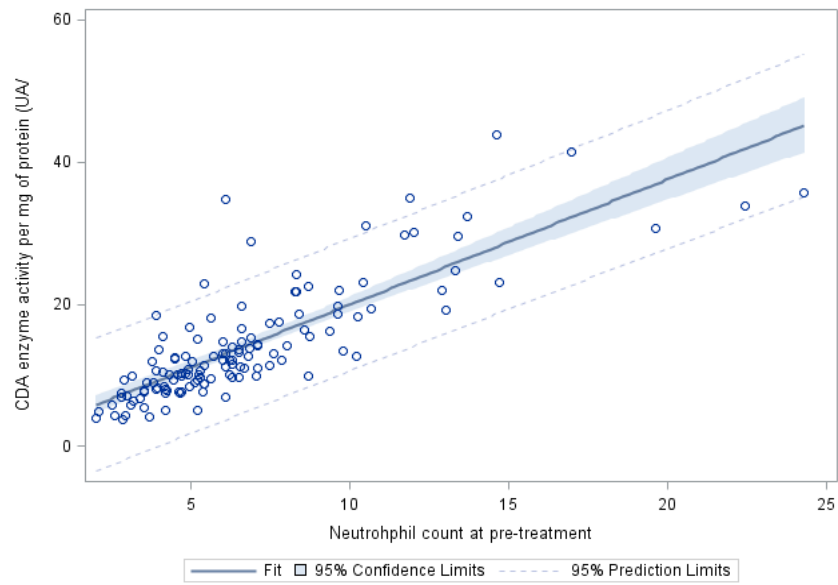

**Figure S3:** Box plot for pretreatment whole blood CDA activity and any haematological CTCAE grade during (A) cycle 1 and (B) during first 2 cycles of chemotherapy (both arms combined)

(A)

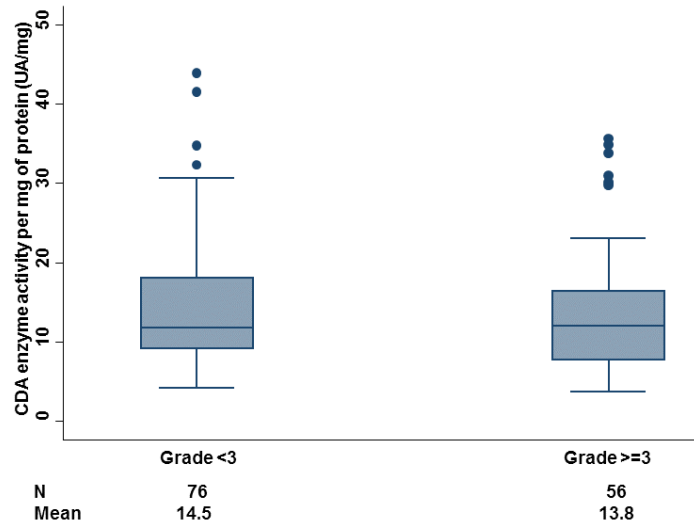

(B)

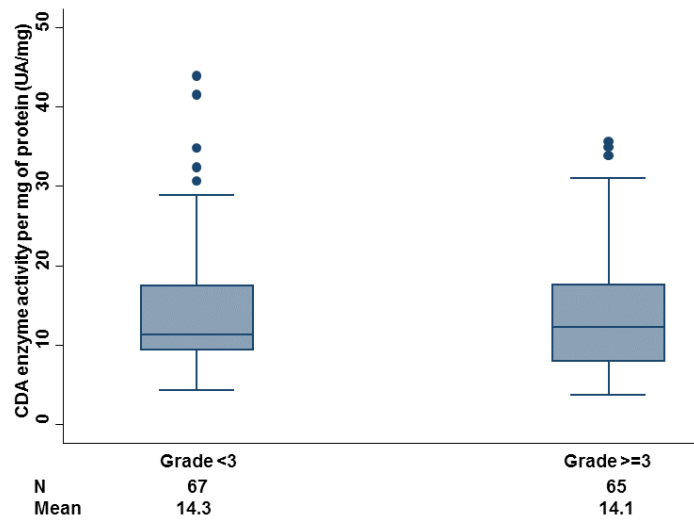



**Figure S4.** Median whole blood CDA activity measured from start of cycle 1 until start of cycle 2 chemotherapy, by trial arm

a) Unadjusted CDA activity

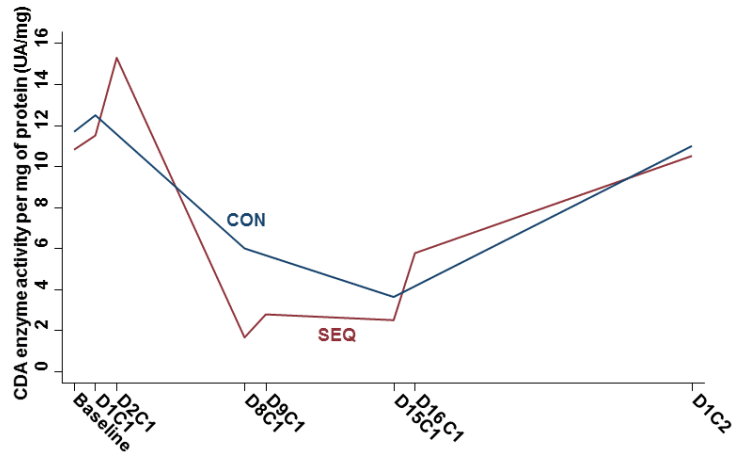

b) CDA activity, after adjusting for neutrophil count (CDA/neutrophil count)

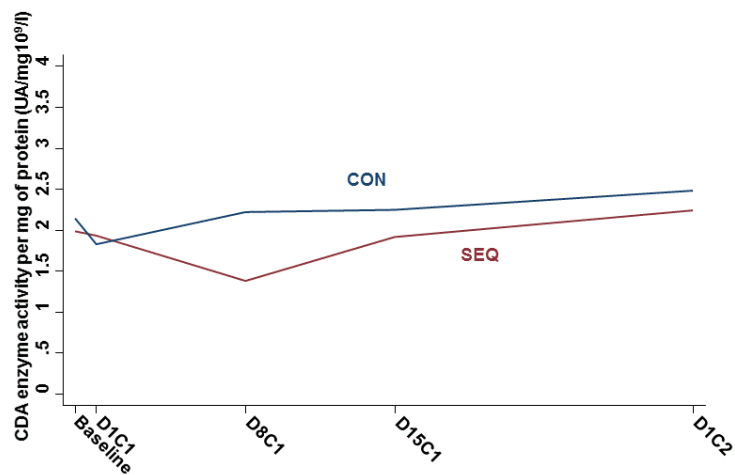

**Figure S5. Kaplan-Meier plots of PFS and OS, by subgroups determined by pretreatment tumour biopsy immunohistochemical analyses**

**A) Tumour grade**

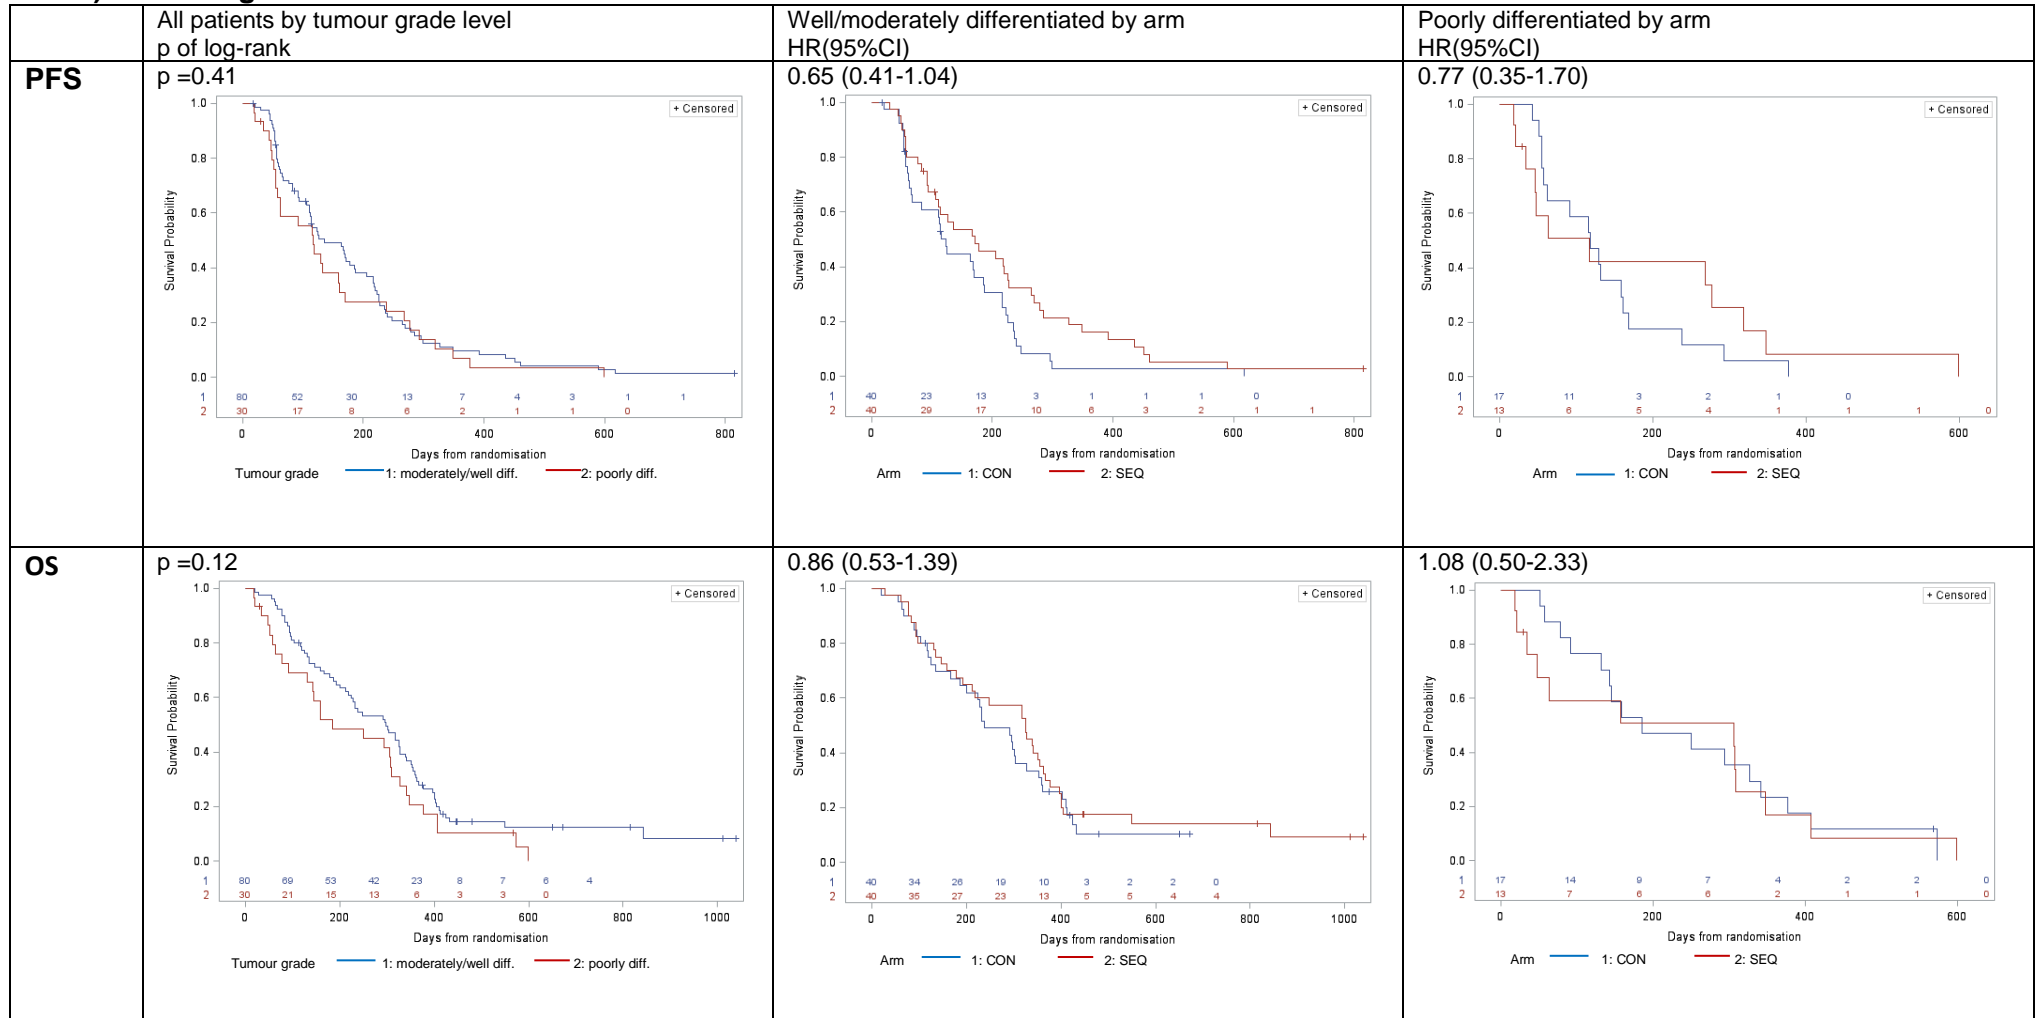

**B) CDA expression – Tumour epithelium**

|            | All patients, by CDA expression<br>p –value of log-rank test                                         | Negative/weakly positive/positive, by trial arm<br>HR (95%CI) | Strongly positive, by trial arm<br>HR (95%CI)               |
|------------|------------------------------------------------------------------------------------------------------|---------------------------------------------------------------|-------------------------------------------------------------|
| <b>PFS</b> | <p>p=0.24</p> <p>IHC CDA — 1:diffuse strong — 2:negative/focal weak/diffuse weak or focal strong</p> | <p>0.91 (0.56-1.48)</p> <p>Arm — 1: CON — 2: SEQ</p>          | <p><b>0.31 (0.13-0.70)</b></p> <p>Arm — 1: CON — 2: SEQ</p> |
| <b>OS</b>  | <p>p=0.88</p> <p>IHC CDA — 1:diffuse strong — 2:negative/focal weak/diffuse weak or focal strong</p> | <p>1.07 (0.65-1.76)</p> <p>Arm — 1: CON — 2: SEQ</p>          | <p>0.74(0.36-1.56)</p> <p>Arm — 1: CON — 2: SEQ</p>         |

**C) CDA expression – stromal cells**

|            | All patients, by CDA expression<br>p –value of log-rank test                                                | Weakly positive/positive, by trial arm<br>HR (95%CI) | Strongly positive, by trial arm<br>HR (95%CI)        |
|------------|-------------------------------------------------------------------------------------------------------------|------------------------------------------------------|------------------------------------------------------|
| <b>PFS</b> | <p>p=0.12</p> <p>IHC CDA stroma — 1:diffuse strong — 2:negative/focal weak/diffuse weak or focal strong</p> | <p>0.74 (0.46-1.20)</p> <p>Arm — 1: CON — 2: SEQ</p> | <p>0.73 (0.17-3.07)</p> <p>Arm — 1: CON — 2: SEQ</p> |
| <b>OS</b>  | <p>p=0.48</p> <p>IHC CDA stroma — 1:diffuse strong — 2:negative/focal weak/diffuse weak or focal strong</p> | <p>1.10 (0.67-1.79)</p> <p>Arm — 1: CON — 2: SEQ</p> | <p>1.49(0.33-6.81)</p> <p>Arm — 1: CON — 2: SEQ</p>  |

**D) Presence of tumour stroma**

|            | All patients, by presence of tumour stroma<br>p-value of log-rank test | No/minimal stroma, by trial arm<br>HR (95%CI) | Moderate/extensive stroma, by trial arm<br>HR (95%CI) |
|------------|------------------------------------------------------------------------|-----------------------------------------------|-------------------------------------------------------|
| <b>PFS</b> | <p><b>p = 0.027</b></p>                                                | <p><b>0.56 ( 0.30-1.03)</b></p>               | <p><b>0.60 (0.34-1.06)</b></p>                        |
| <b>OS</b>  | <p><b>p=0.023</b></p>                                                  | <p><b>0.79 (0.45-1.38)</b></p>                | <p><b>0.85 (0.47-1.53)</b></p>                        |
